# Supplementary material for: Artemisinin kills malaria parasites by damaging proteins and inhibiting the proteasome
Source: PubMed Central journal article supplement (PMC6143634; doi:10.1038/s41467-018-06221-1), 2018-09-18
Supplement: 41467_2018_6221_MOESM1_ESM.pdf [file 41467_2018_6221_MOESM1_ESM.pdf]

# Supplementary Materials for

**Artemisinin kills malaria parasites by damaging proteins and inhibiting the proteasome**

**Bridgford et al.**

**This PDF file includes: Supplementary Figures 1 to 7**

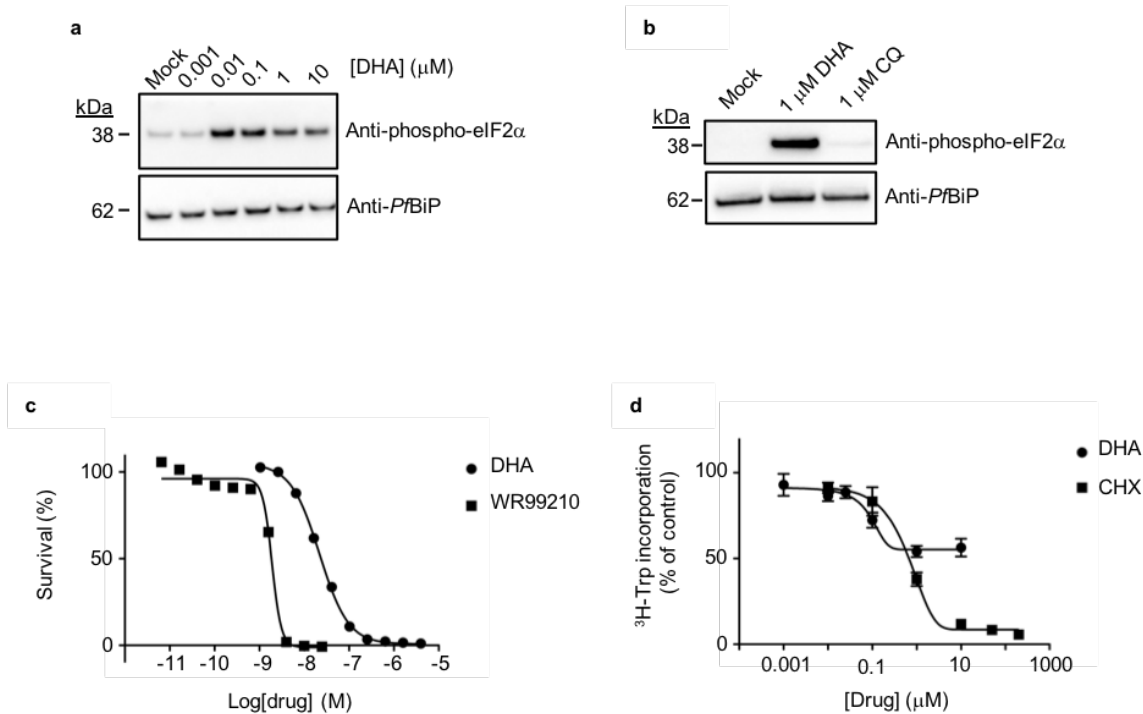

**Supplementary Figure 1. Analysis of DHA and control drug-induced unfolded protein response, translation arrest and killing.** (a) Mid-ring stage-infected RBCs (Cam3.II\_rev) were treated with 0.1% DMSO (mock) or DHA for 3 h and harvested before lysates were subjected to Western blot analysis and membranes probed for phosphorylated-eIF2 $\alpha$ . Blot is representative of three independent experiments. (b) Trophozoite-infected RBCs (3D7) were treated with 0.1% DMSO (mock) or DHA or chloroquine (CQ) for 60 min and harvested before lysates were subjected to Western blot analysis and membranes probed for phosphorylated-eIF2 $\alpha$ . Blot is representative of two independent experiments. (c) Trophozoite-stage parasites (3D7) were treated with DHA (circles) or WR99210 (squares) for 1 h before the drugs were washed out. Parasites were returned to culture and parasitemia was measured in the following trophozoite stage. Data are representative of two independent experiments. (d) Protein synthesis was measured in trophozoite stage parasites (~30 h post invasion; 3D7,  $5 \times 10^7$  cells) that were exposed to increasing concentrations of DHA (circles) or cycloheximide (CHX, squares) for 30 min (in RPMI without AlbuMax at 37°C) and then incubated in AlbuMax-free RPMI containing the same drug concentration plus  $^3\text{H}$ -tryptophan for 1 h (37°C). Radiolabelled proteins were precipitated, solubilised, and scintillation counted. Error bars represent s.e.m. ( $n = 3$ ).

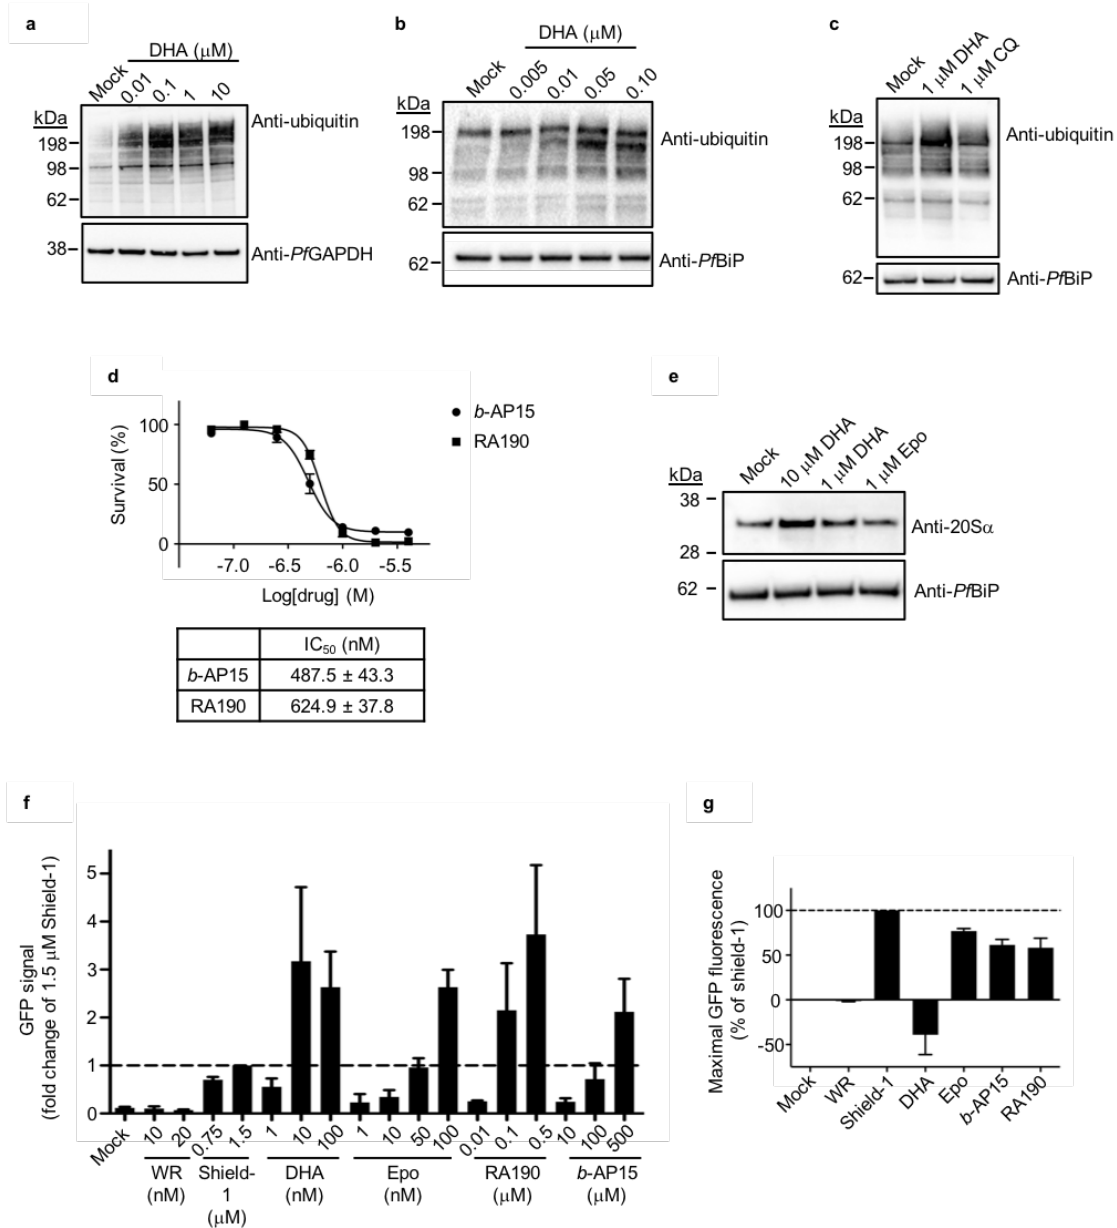

**Supplementary Figure 2. Accumulation of polyubiquitinated proteins, protein unfolding and toxicity of inhibitors of ubiquitin-dependent proteasome activity.** (a-c) Infected RBCs (Cam3.II\_rev trophozoites (a) or Cam3.II\_rev ring stage 15% parasitemia (b) or 3D7 trophozoites (c)) were treated with 0.1% DMSO (mock) or DHA for 90 min (a) or 3 h (b) or DHA or chloroquine (CQ) for 60 min (c) before lysates were subjected to Western blot analysis. Loading controls, *Pf*GAPDH (a) or *Pf*BiP (b, c). (d) Ring stage parasite cultures (0-3 h post invasion; Cam3.II\_rev) were treated with various concentrations of *b*-AP15 (circles) or RA190 (squares) for 3 h at 37°C. The drug was washed out and parasites were returned to culture for 72 h before assessment of parasitemia by flow cytometry. Error bars represent s.e.m. ( $n = 3$ ). (e) Western blot analysis of 20S proteasome  $\alpha$  sub-units (1-3, 5-7) after treatment of trophozoite-stage parasites (Cam3.II\_rev) with 0.1% DMSO (mock), DHA or epoxomicin for 1 h. Blot is

representative of three independent experiments. Loading control, *PfBiP*. **(f)** Grouped quantitation of Western blot data corresponding to Fig. 2g. The GFP signal was normalised to *PfBiP* signal and expressed as fold change relative to 1.5  $\mu$ M Shield-1. Error bars represent s.e.m. ( $n = 7$  (DMSO),  $n = 6$  (DHA),  $n = 5$  (Shield-1 1.5  $\mu$ M),  $n = 4$  (Epo 10 nM, 100 nM),  $n = 3$  (WR, Shield-1 0.75  $\mu$ M; RA190; *b*-AP15),  $n = 2$  (Epo 1 nM, 50 nM)). **(g)** Grouped quantitation of GFP fluorescence data corresponding to Fig. 2h. Dotted line indicates mean maximal fluorescence at 1/1.5  $\mu$ M Shield-1. Data represent the mean % maximal fluorescence (at two highest concentrations tested) relative to Shield-1 (100%) and mock (0.1% DMSO)-treated samples from 5-13 independent experiments including Fig. 2h. Error bars represent s.e.m. ( $n = 5$  (*b*-AP15, RA190, WR),  $n = 13$  (Shield-1, DHA, Epo)).

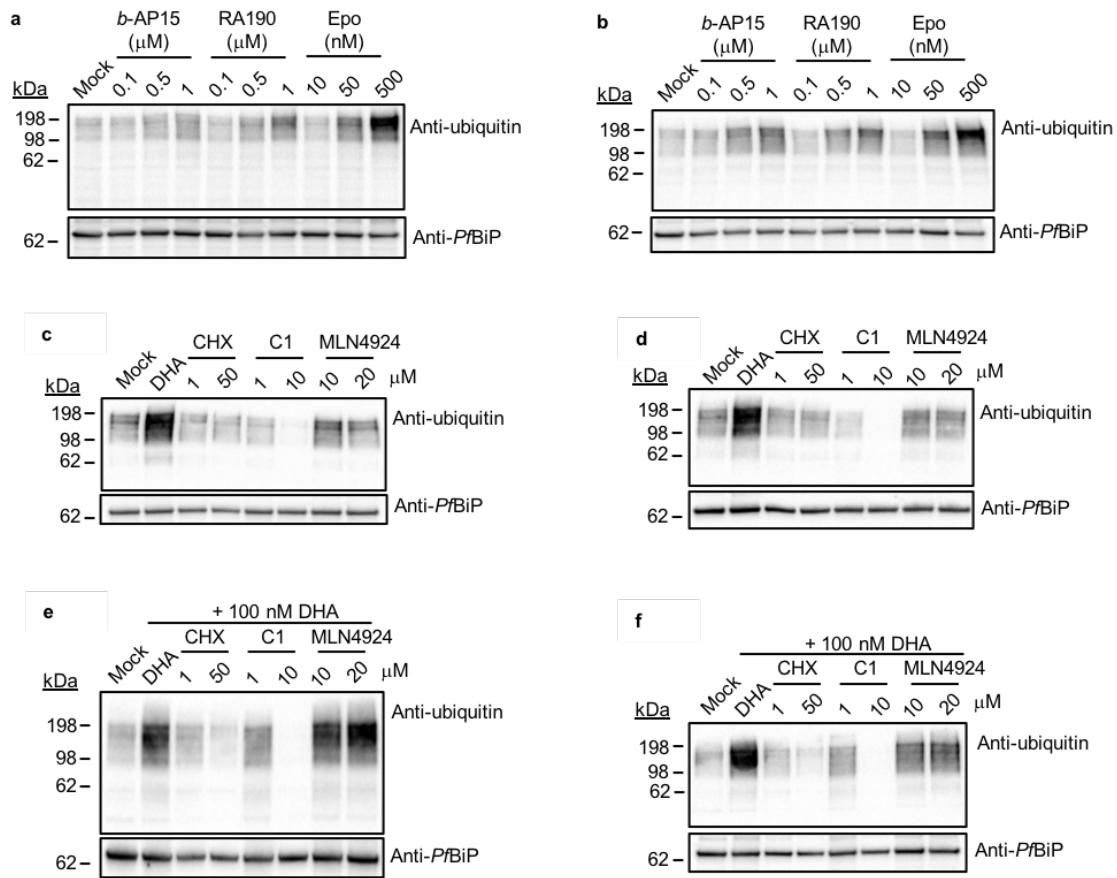

**Supplementary Figure 3. Biological replicates of blots presented in the main figures.**

(a, b) Biological replicates of blot presented in Fig. 2b. Trophozoites (3D7) were incubated with 0.1% DMSO (mock) or DHA (90 min) or *b*-AP15, RA190 or Epo (epoxomicin) (3 h) and extracts were probed for ubiquitinated proteins. (c-f) Biological replicates of blots presented in Fig. 3a (c, d) and Fig. 3b (e-f). Trophozoites (3D7) were subjected to the indicated treatment for 6 h before analysis of ubiquitinated proteins. Samples treated with MLN4924 were incubated for an additional 3 h prior to DHA treatment.

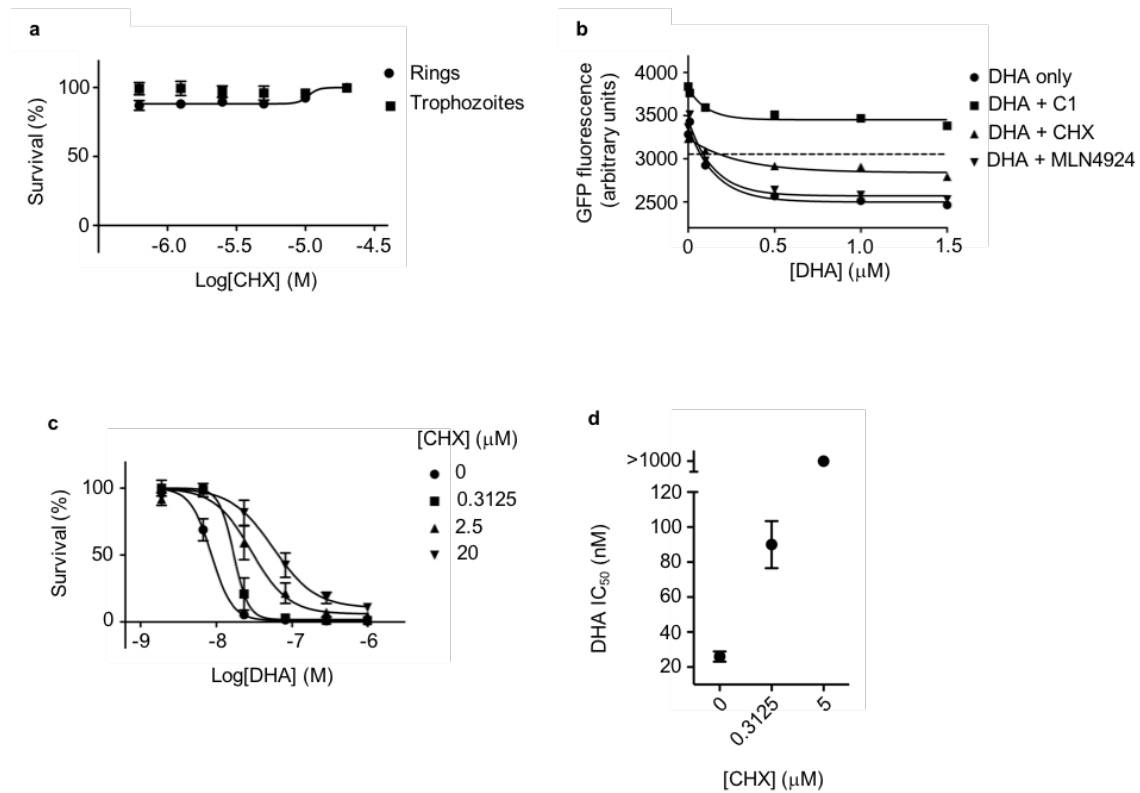

**Supplementary Figure 4. Cycloheximide (CHX) antagonises DHA-mediated build-up of polyubiquitinated proteins, protein unfolding and killing.** (a) Ring stage (0-2 h post invasion, circles) or trophozoite stage (24-26 h post invasion, squares) parasites (Cam3.II\_rev) were subjected to a 6 h pulse with CHX and parasitemia assessed in the following cycle. (b) Flow cytometry signal after GFP-DD trophozoites (in a 3D7 background) were incubated with 20  $\mu\text{M}$  of C1 (squares), CHX (upright triangles), MLN4924 (upsidedown triangles) or vehicle (circles) for 3 h, prior to exposure to DHA for 3 h (raw data corresponding to Fig. 3c). Dotted line represents background (fluorescence of sample without Shield-1). Data is representative of at least four independent experiments. (c) Trophozoite stage parasites (24-26 h post invasion; Cam3.II\_rev) were incubated with 0.3135  $\mu\text{M}$  (squares), 2.5  $\mu\text{M}$  (upright triangles) or 20  $\mu\text{M}$  (upsidedown triangles) CHX or vehicle (circles) for 3 h prior to a 3 h DHA pulse, and parasitemia was assessed in the following cycle. (d) Analysis of CHX antagonism of DHA activity in a ring stage survival assay (corresponding to data in Fig. 3e). In all cases, error bars represent s.e.m. ( $n = 3$ ).

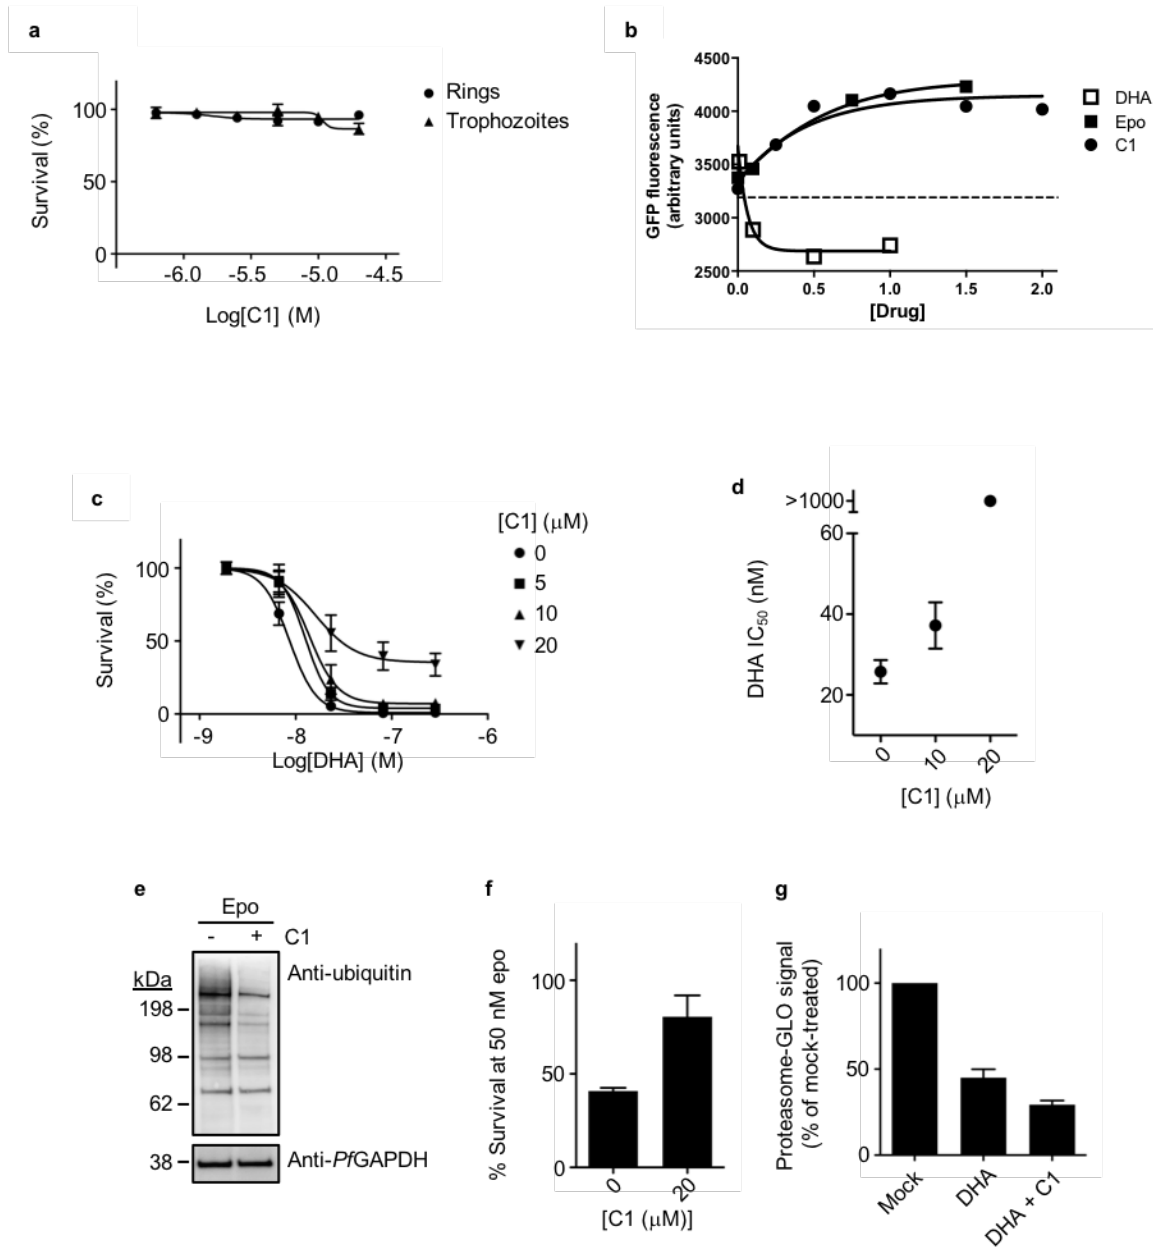

**Supplementary Figure 5. C1 antagonises DHA and epoxomicin but does not prevent functional inhibition of the proteasome.** (a) Ring stage (0-2 h post invasion, circles) or trophozoite stage (24-26 h post invasion, triangles) parasites (Cam3.II\_rev) were subjected to a 6 h pulse with C1 and parasitemia assessed in the following cycle. (b) GFP-DD transfected cells (in a 3D7 background) were maintained in Shield-1 for 24 h, before wash-out. Trophozoites were exposed to DHA (open squares), Epo (closed squares) or C1 (circles) for 4 h, and GFP fluorescence measured by flow cytometry. Dotted line represents background (fluorescence of sample without Shield-1). Data are representative of two independent experiments. (c) Trophozoite stage parasites (24-26 h post invasion; Cam3.II\_rev) were incubated with 5 µM (squares), 10 µM (upright triangles) or 20 µM (upside-down triangles) C1 or vehicle (circles) for 3 h prior to a 3 h DHA pulse, and

parasitemia was assessed in the following cycle. **(d)** Analysis of C1 antagonism of DHA activity in a ring stage survival assay (corresponding to data in Fig. 3f). **(e)** Trophozoite stage parasites (Cam3.II\_rev) were treated with 400 nM epoxomicin (Epo) with or without 10  $\mu$ M C1 for 3 h at 37°C and lysates assessed by Western blot for ubiquitinated proteins. Loading control, *Pf*GAPDH. **(f)** Ring stage parasites (0-2 h post invasion; Cam3.II\_rev) in cell culture were treated with 50 nM epoxomicin (Epo) with or without 20  $\mu$ M C1 for 3 h at 37°C. The compounds were washed out and parasites were returned to culture for 72 h before assessment of parasitemia by flow cytometry. Error bars represent s.e.m. ( $n = 2$ ). **(g)** Trophozoite stage parasites (Cam3.II\_rev) were pre-incubated with or without 20  $\mu$ M C1 for 3 h, then incubated in the presence of 1  $\mu$ M DHA for 3 h. Proteasome activity in cell lysates was measured using the proteasome-GLO system. In all cases error bars represent s.e.m. ( $n = 3$ , except where otherwise stated).



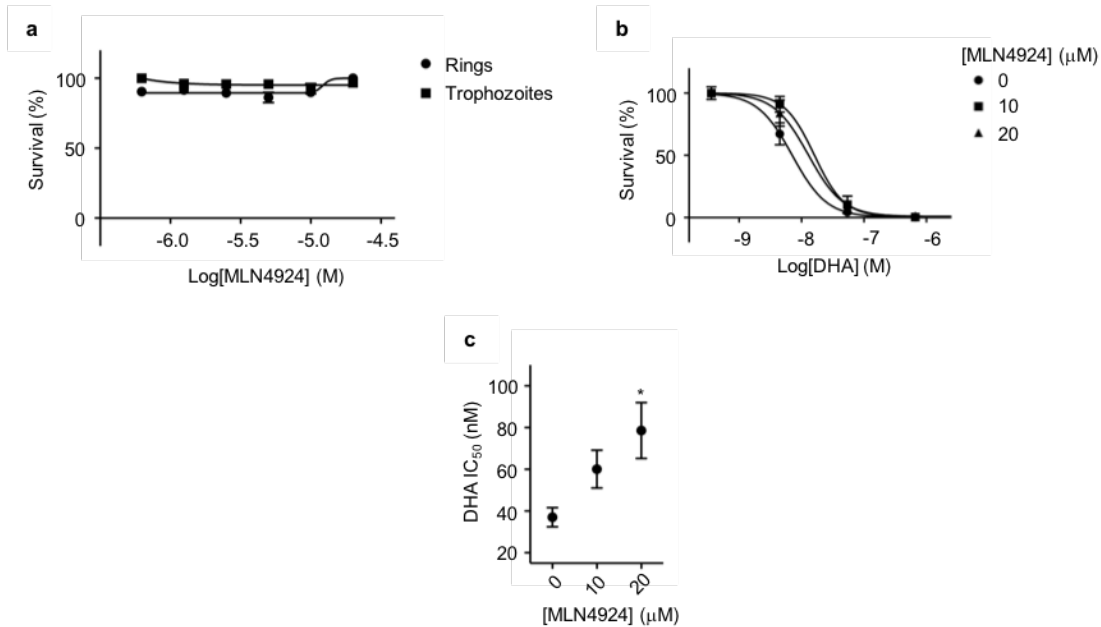

**Supplementary Figure 6. MLN4924 antagonises DHA-mediated killing.** (a) Ring stage (0-2 h post invasion, circles) or trophozoite stage (24-26 h post invasion, squares) parasites (Cam3.II\_rev) were subjected to a 6 h pulse with MLN4924 and parasitemia assessed in the following cycle. (b) Trophozoite stage parasites (24-26 h post invasion; Cam3.II\_rev) were incubated with 10  $\mu$ M (squares) or 20  $\mu$ M (triangles) MLN4924 or vehicle (circles) for 3 h prior to a 3 h DHA pulse, and parasitemia was assessed in the following cycle. (c) Analysis of MLN4924 antagonism of DHA activity in a ring stage survival assay (corresponding to data in Fig. 3g). \* $P = 0.042$  between 20  $\mu$ M MLN4924 and no MLN4924 treated samples, using two-tailed unpaired  $t$ -test. In all cases, error bars represent s.e.m. ( $n = 3$ )

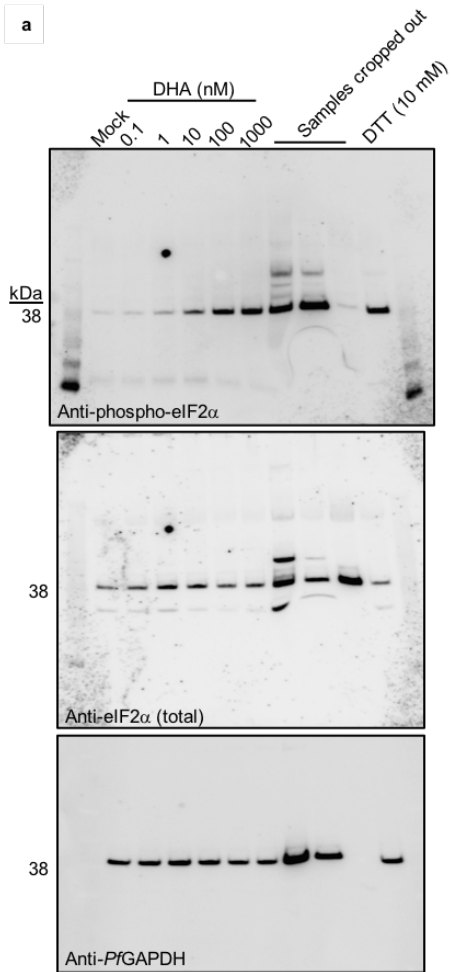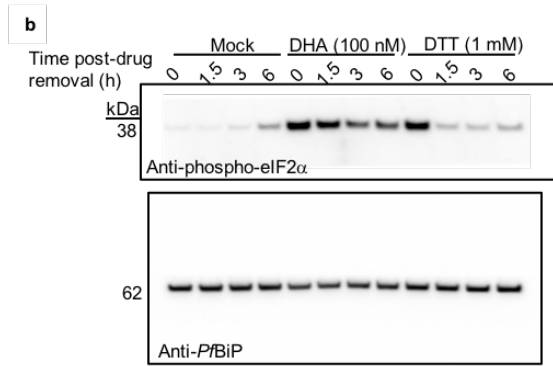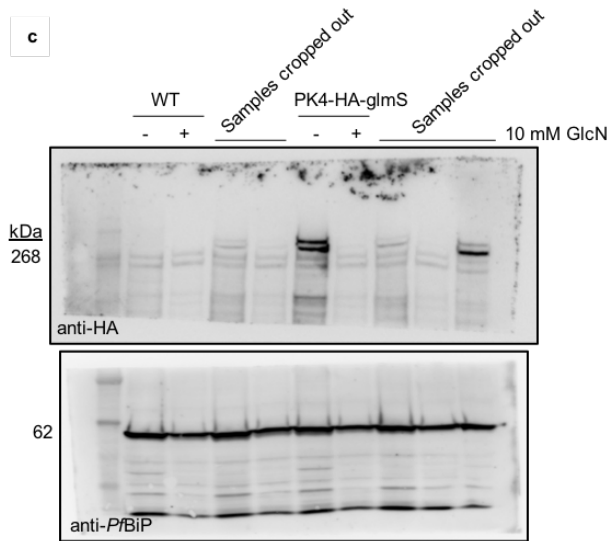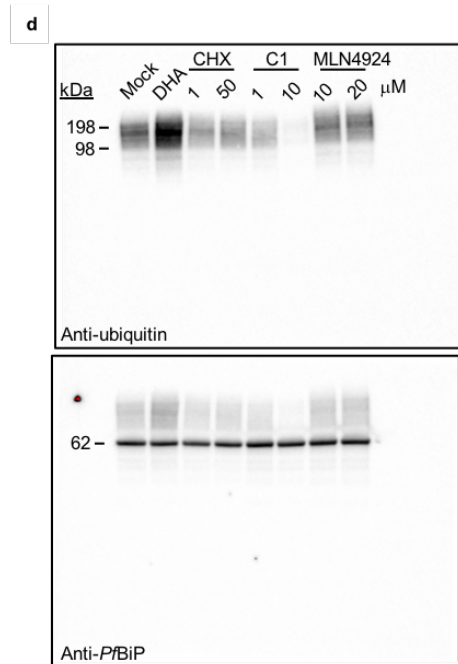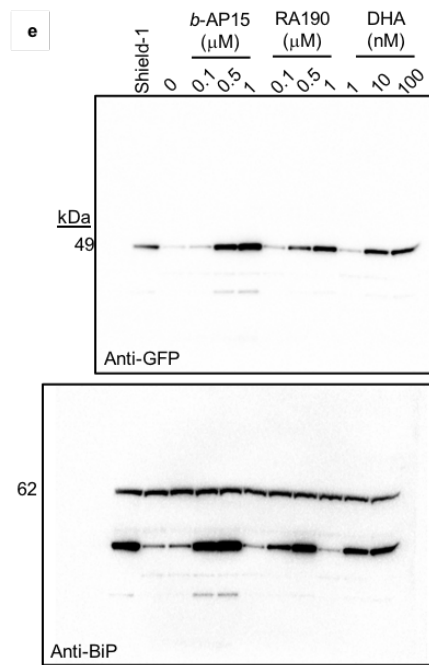

**Supplementary Figure 7. Uncropped versions of Western blots.** (a) Uncropped blots corresponding to those presented in Fig. 1a. Blot was originally probed with rabbit anti-phospho-eIF2 $\alpha$  (top), stripped and reprobed with mouse anti-eIF2 $\alpha$  (total, middle) and then stripped again and reprobed with rabbit anti-*Pf*GAPDH (bottom). (b) Uncropped blots corresponding to Fig. 1b. The blot was cut into two sections prior to probing: 28-49 kDa, which was probed with anti-phospho-eIF2 $\alpha$  (top); and 49-98 kDa, which was probed with anti-*Pf*BiP (bottom). (c) Uncropped blots corresponding to those presented in Fig 1e. The blot was cut into two sections prior to probing: >98 kDa, which was probed with anti-HA (top); and <98 kDa, which was probed with anti-*Pf*BiP. (d) Uncropped blots corresponding to those presented in Fig. 3a. The blot was initially probed with anti-ubiquitin (top) and then with anti-*Pf*BiP (bottom). (e) Uncropped blots corresponding to those presented in Fig. 2g (right panel). The blot was initially probed with mouse anti-GFP (top), then reblocked and probed with rabbit anti-*Pf*BiP (bottom).
